# Supplementary material
Source: publisher site journal article supplement (https://www.degruyterbrill.com/publication/isbn/9783486700442/downloadAsset/9783486700442_Inhaltsverzeichnis.pdf)
Supplement: Supplementary file 1 [file 9783486700442_Inhaltsverzeichnis.pdf]

# Inhaltsverzeichnis

|                                                                                                                      |    |
|----------------------------------------------------------------------------------------------------------------------|----|
| Vorwort . . . . .                                                                                                    | 11 |
| Eingangstest . . . . .                                                                                               | 13 |
| <i>Erster Lehrabschnitt: Notwendigkeit, Ziele und Aufgaben der Kosten- und Leistungsrechnung . . . . .</i>           |    |
| 1.1 Notwendigkeit einer aussagefähigen Kosten- und Leistungsrechnung . . .                                           | 17 |
| 1.2 Ziele und Aufgaben der Kosten- und Leistungsrechnung . . . . .                                                   | 18 |
| 1.3 Neue Anforderungen an die Kostenrechnung . . . . .                                                               | 21 |
| 1.4 Übungen und Testaufgaben zum ersten Lehrabschnitt . . . . .                                                      | 25 |
| <i>Zweiter Lehrabschnitt: Einordnung der Kosten- und Leistungsrechnung in die Unternehmensorganisation . . . . .</i> |    |
| 2.1 Traditionelle Einteilung des Betrieblichen Rechnungswesens . . . . .                                             | 29 |
| 2.2 Neuere Einteilung des Betrieblichen Rechnungswesens . . . . .                                                    | 31 |
| 2.3 Hierarchiestufen im Betrieblichen Rechnungswesen . . . . .                                                       | 32 |
| 2.4 Übungen und Testaufgaben zum zweiten Lehrabschnitt . . . . .                                                     | 34 |
| <i>Dritter Lehrabschnitt: Unerläßliche Grundbegriffe der Kosten- und Leistungsrechnung . . . . .</i>                 |    |
| 3.1 Begriffspaar: Auszahlung – Einzahlung . . . . .                                                                  | 38 |
| 3.2 Begriffspaar: Ausgabe – Einnahme . . . . .                                                                       | 39 |
| 3.3 Begriffspaar: Aufwand – Ertrag . . . . .                                                                         | 40 |
| 3.4 Begriffspaar: Kosten – Leistung . . . . .                                                                        | 41 |
| 3.4.1 Der Kostenbegriff . . . . .                                                                                    | 41 |
| 3.4.2 Der Leistungsbegriff . . . . .                                                                                 | 42 |
| 3.5 Beziehungen zwischen Aufwand und Kosten . . . . .                                                                | 43 |
| 3.5.1 Neutraler Aufwand . . . . .                                                                                    | 45 |
| 3.5.1.1 Von den Kosten wesensverschiedene Aufwendungen . . . . .                                                     | 45 |
| 3.5.1.2 Von den Kosten verrechnungsmäßig verschiedene Aufwendungen . . . . .                                         | 46 |

|                                                                                                                                   |    |
|-----------------------------------------------------------------------------------------------------------------------------------|----|
| 3.5.2 Zweckaufwand bzw. Grundkosten . . . . .                                                                                     | 47 |
| 3.5.3 Kalkulatorische Kosten (Zusatzkosten) . . . . .                                                                             | 48 |
| 3.5.3.1 Von den Aufwendungen wesensverschiedene Zusatzkosten                                                                      | 48 |
| 3.5.3.2 Von den Aufwendungen verrechnungsmäßig verschiedene<br>Zusatzkosten . . . . .                                             | 49 |
| 3.6 Beziehungen zwischen Ertrag und Leistung . . . . .                                                                            | 49 |
| 3.7 Übungen und Testaufgaben zum dritten Lehrabschnitt . . . . .                                                                  | 51 |
| <br><i>Vierter Lehrabschnitt: Gesamtzusammenhang zwischen Kostenarten-, Kostenstellen-<br/>und Kostenträgerrechnung . . . . .</i> |    |
| 4.1 Begriffliche Festlegungen . . . . .                                                                                           | 59 |
| 4.2 Prinzipien der Kosten- und Leistungsrechnung . . . . .                                                                        | 60 |
| 4.3 Übungen und Testaufgaben zum vierten Lehrabschnitt . . . . .                                                                  | 62 |
| <br><i>Fünfter Lehrabschnitt: Informationsquellen der Kosten- und Leistungsrechnung . . .</i>                                     |    |
| 5.1 Finanzbuchhaltung als Hauptinformationsquelle . . . . .                                                                       | 63 |
| 5.2 Sonstige Informationsquellen der Kosten- und Leistungsrechnung . . . . .                                                      | 65 |
| 5.3 Integrierte und isolierte Kosten- und Leistungsrechnung . . . . .                                                             | 67 |
| 5.4 Übungen und Testaufgaben zum fünften Lehrabschnitt . . . . .                                                                  | 68 |
| <br><i>Sechster Lehrabschnitt: Grundprinzipien der Kostenartenrechnung . . . . .</i>                                              |    |
| 6.1 Gliederungskriterien der Kostenartenrechnung . . . . .                                                                        | 72 |
| 6.1.1 Gliederung der Kostenarten nach Produktionsfaktoren bzw. der Ver-<br>zehrsart . . . . .                                     | 72 |
| 6.1.2 Gliederung der Kostenarten nach der Zurechenbarkeit auf die<br>Kostenträger . . . . .                                       | 73 |
| 6.1.3 Gliederung der Kostenarten nach dem Verhalten bei Beschäftigungs-<br>schwankungen . . . . .                                 | 75 |
| 6.1.3.1 Fixe Kosten . . . . .                                                                                                     | 75 |
| 6.1.3.2 Variable Kosten . . . . .                                                                                                 | 77 |
| 6.1.3.3 Mischkosten (semivariable Kosten) . . . . .                                                                               | 80 |
| 6.1.4 Gliederung der Kostenarten nach der buchhalterischen Erfassung . .                                                          | 80 |
| 6.1.5 Gliederung der Kostenarten nach dem Zeitbezug . . . . .                                                                     | 81 |
| 6.1.6 Gliederung der Kostenarten nach der Ausgabenwirksamkeit . . . .                                                             | 81 |
| 6.1.7 Gliederung der Kostenarten nach der betrieblichen Bedeutung . . .                                                           | 81 |
| 6.1.8 Unterteilung in primäre und sekundäre Kostenarten . . . . .                                                                 | 82 |
| 6.2 Kostenartenplan . . . . .                                                                                                     | 83 |
| 6.3 Zwischentest . . . . .                                                                                                        | 83 |
| 6.4 Erfassung und Bewertung der einzelnen Kostenarten . . . . .                                                                   | 85 |
| 6.4.1 Erfassung und Bewertung der Materialkosten . . . . .                                                                        | 85 |
| 6.4.2 Erfassung und Bewertung der Personalkosten . . . . .                                                                        | 92 |

|                                                                                                                           |     |
|---------------------------------------------------------------------------------------------------------------------------|-----|
| 6.4.3 Erfassung und Bewertung der Instandhaltungskosten . . . . .                                                         | 95  |
| 6.4.4 Erfassung und Bewertung von Steuern in der Kostenrechnung . . .                                                     | 96  |
| 6.4.5 Erfassung und Bewertung der kalkulatorischen Kosten . . . . .                                                       | 97  |
| 6.4.5.1 Kalkulatorischer Unternehmerlohn . . . . .                                                                        | 98  |
| 6.4.5.2 Kalkulatorische Miete . . . . .                                                                                   | 100 |
| 6.4.5.3 Kalkulatorische Abschreibungen . . . . .                                                                          | 101 |
| 6.4.5.4 Kalkulatorische Zinsen . . . . .                                                                                  | 109 |
| 6.4.5.5 Kalkulatorische Wagnisse . . . . .                                                                                | 111 |
| 6.5 Informationsgehalt der Kostenartenrechnung . . . . .                                                                  | 114 |
| 6.6 Übungen und Testaufgaben zum sechsten Lehrabschnitt . . . . .                                                         | 116 |
| <i>Siebenter Lehrabschnitt: Grundprinzipien der Kostenstellenrechnung</i> . . . . .                                       | 121 |
| 7.1 Zweckmäßige Kostenstellengliederung als Hauptvoraussetzung einer aus-<br>sagefähigen Kostenstellenrechnung . . . . .  | 121 |
| 7.1.1 Kriterien für die Bildung von Kostenstellen . . . . .                                                               | 122 |
| 7.1.2 Detaillierungsgrad der Kostenstellenbildung . . . . .                                                               | 123 |
| 7.1.3 Arten von Kostenstellen . . . . .                                                                                   | 124 |
| 7.2 Der Kostenstellenplan in der Praxis . . . . .                                                                         | 126 |
| 7.3 Formen der Kostenstellenrechnung . . . . .                                                                            | 127 |
| 7.4 Der Betriebsabrechnungsbogen (BAB) . . . . .                                                                          | 128 |
| 7.4.1 Aufgaben des Betriebsabrechnungsbogens . . . . .                                                                    | 128 |
| 7.4.2 Aufbau des Betriebsabrechnungsbogens . . . . .                                                                      | 129 |
| 7.4.3 Formen des Betriebsabrechnungsbogens . . . . .                                                                      | 130 |
| 7.4.4 Ablauforganisation des Betriebsabrechnungsbogens . . . . .                                                          | 133 |
| 7.4.4.1 Verteilung der primären Gemeinkosten auf die Kostenstellen                                                        | 136 |
| 7.4.4.2 Innerbetriebliche Leistungsverrechnung zwischen Kosten-<br>stellen (Verteilung sekundärer Gemeinkosten) . . . . . | 138 |
| 7.4.4.3 Ermittlung von Kostenverrechnungssätzen (Gemeinkosten-<br>zuschlagsätzen für die Kostenträgerrechnung) . . . . .  | 146 |
| 7.4.4.4 Ermittlung von Kostenüber- oder -unterdeckungen . . . . .                                                         | 151 |
| 7.4.4.5 Ermittlung von Betriebskennziffern . . . . .                                                                      | 152 |
| 7.4.5 Beispiel zum Betriebsabrechnungsbogen . . . . .                                                                     | 153 |
| 7.5 Übungs-BAB zum siebenten Lehrabschnitt . . . . .                                                                      | 155 |
| 7.6 Übungen und Testaufgaben zum siebenten Lehrabschnitt . . . . .                                                        | 157 |
| <i>Achter Lehrabschnitt: Die Kostenträgerrechnung</i> . . . . .                                                           | 165 |
| 8.1 Kostenträger und Kostenträgerrechnung . . . . .                                                                       | 165 |
| 8.2 Kostenträgerstückrechnung und Kostenträgerzeitrechnung . . . . .                                                      | 167 |
| 8.3 Kostenträgerzeitrechnung (kurzfristige Erfolgsrechnung) . . . . .                                                     | 168 |
| 8.3.1 Gliederung der Kostenträgerzeitrechnung . . . . .                                                                   | 169 |
| 8.3.2 Formen der Kostenträgerzeitrechnung . . . . .                                                                       | 169 |
| 8.3.2.1 Umsatzkostenverfahren . . . . .                                                                                   | 170 |

|                                                         |                                                                          |     |
|---------------------------------------------------------|--------------------------------------------------------------------------|-----|
| 8.3.2.2                                                 | Gesamtkostenverfahren . . . . .                                          | 170 |
| 8.3.2.3                                                 | Übungsbeispiel zur Kostenträgerzeitrechnung . . . . .                    | 171 |
| 8.4                                                     | Kostenträgerstückrechnung (Kalkulation) . . . . .                        | 172 |
| 8.4.1                                                   | Formen der Kostenträgerstückrechnung . . . . .                           | 172 |
| 8.4.2                                                   | Kalkulationszeitpunkte (Vor-, Zwischen- und Nachkalkulation) . .         | 172 |
| 8.4.3                                                   | Divisionskalkulation . . . . .                                           | 175 |
| 8.4.3.1                                                 | Einfache Divisionskalkulation (einstufige Divisionskalkulation). . . . . | 175 |
| 8.4.3.2                                                 | Mehrstufige Divisionskalkulation (Stufendivisionskalkulation). . . . .   | 177 |
| 8.4.3.3                                                 | Äquivalenzziffernrechnung . . . . .                                      | 180 |
| 8.4.4                                                   | Kalkulation bei Kuppelproduktion . . . . .                               | 182 |
| 8.4.5                                                   | Zuschlagskalkulation . . . . .                                           | 184 |
| 8.4.5.1                                                 | Einfache Zuschlagskalkulation . . . . .                                  | 185 |
| 8.4.5.2                                                 | Erweiterte Zuschlagskalkulation . . . . .                                | 187 |
| 8.4.5.2.1                                               | Erweiterte Zuschlagskalkulation in der Industrie . .                     | 188 |
| 8.4.5.2.2                                               | Erweiterte Zuschlagskalkulation im Dienstleistungsbereich . . . . .      | 195 |
| 8.5                                                     | Übungen und Testaufgaben zum achten Lehrabschnitt . . . . .              | 200 |
| <i>Neunter Lehrabschnitt: Lösungshinweise . . . . .</i> |                                                                          | 204 |
| 9.0                                                     | Eingangstest . . . . .                                                   | 204 |
| 9.1                                                     | Erster Lehrabschnitt . . . . .                                           | 206 |
| 9.2                                                     | Zweiter Lehrabschnitt . . . . .                                          | 208 |
| 9.3                                                     | Dritter Lehrabschnitt . . . . .                                          | 210 |
| 9.4                                                     | Vierter Lehrabschnitt . . . . .                                          | 214 |
| 9.5                                                     | Fünfter Lehrabschnitt . . . . .                                          | 215 |
| 9.6                                                     | Sechster Lehrabschnitt . . . . .                                         | 216 |
| 9.6.1                                                   | Zwischentest . . . . .                                                   | 216 |
| 9.6.2                                                   | Übungen und Testaufgaben . . . . .                                       | 217 |
| 9.7                                                     | Siebenter Lehrabschnitt . . . . .                                        | 222 |
| 9.7.1                                                   | Kostenstellenausgleich und -umlage . . . . .                             | 222 |
| 9.7.2                                                   | Betriebsabrechnungsbogen . . . . .                                       | 224 |
| 9.7.3                                                   | Übungen und Testaufgaben . . . . .                                       | 225 |
| 9.8                                                     | Achter Lehrabschnitt . . . . .                                           | 232 |
| 9.8.1                                                   | Kurzfristige Erfolgsrechnung . . . . .                                   | 232 |
| 9.8.2                                                   | Divisionskalkulation . . . . .                                           | 232 |
| 9.8.3                                                   | Stufendivisionskalkulation . . . . .                                     | 233 |
| 9.8.4                                                   | Äquivalenzziffernrechnung . . . . .                                      | 234 |
| 9.8.5                                                   | Kuppelproduktion . . . . .                                               | 234 |
| 9.8.6                                                   | Zuschlagskalkulation (Einzelkostenbasis). . . . .                        | 235 |

|        |                                                |     |
|--------|------------------------------------------------|-----|
| 9.8.7  | Bezugsgrößenkalkulation . . . . .              | 235 |
| 9.8.8  | Handelsspanne – Kalkulationszuschlag . . . . . | 236 |
| 9.8.9  | Handelskalkulation . . . . .                   | 236 |
| 9.8.10 | Kompensationskalkulation . . . . .             | 237 |
| 9.8.11 | Übungen und Testaufgaben . . . . .             | 237 |
|        | Literaturverzeichnis . . . . .                 | 243 |
|        | Stichwortverzeichnis . . . . .                 | 244 |
